# Supplementary material for: Identification and Characterization of lncRNA and mRNA in Testes of Landrace and Hezuo Boars
Source: MDPI journal article supplement (doi:10.3390/ani11082263), 2021-07-30
Supplement: s1 [file s1]

Table S2. Diameter of seminiferous tubules in testes of Hezuo boar and Landrace boar of different ages, number of spermatogenic cells and Sertoli cells (mean  $\pm$  SEM).

| Parameters                                          | Hezuo boar (HZ)               |                                 | Landrace boar (LC)            |                                |
|-----------------------------------------------------|-------------------------------|---------------------------------|-------------------------------|--------------------------------|
|                                                     | 30-day-old                    | 120-day-old                     | 30-day-old                    | 120-day-old                    |
| Diameter of Spermatogenic Tubules ( $\mu\text{m}$ ) | 80.85 $\pm$ 4.83 <sup>b</sup> | 176.37 $\pm$ 17.31 <sup>a</sup> | 56.53 $\pm$ 2.55 <sup>b</sup> | 152.11 $\pm$ 2.88 <sup>a</sup> |
| Number of Spermatogenic Cells                       | 21.78 $\pm$ 1.09 <sup>c</sup> | 149.78 $\pm$ 3.61 <sup>a</sup>  | 15.00 $\pm$ 1.58 <sup>c</sup> | 98.89 $\pm$ 3.95 <sup>b</sup>  |
| Number of Sertoli Cells                             | 1.78 $\pm$ 0.44 <sup>b</sup>  | 8.44 $\pm$ 0.91 <sup>a</sup>    | 2.11 $\pm$ 0.22 <sup>b</sup>  | 4.75 $\pm$ 0.91 <sup>a</sup>   |

\* In each row, values with different superscripts are significantly different ( $P < 0.05$ ).
